# Supplementary material
Source: PubMed Central journal article supplement (PMC4333446)
Supplement: IAI.02232-14_zii999091102so1.pdf [file IAI.02232-14_zii999091102so1.pdf]

**Supplemental Table 1**

TABLE S1 Primers used in this study

| Primer     | Sequence (5' to 3')               | Description                                                    |
|------------|-----------------------------------|----------------------------------------------------------------|
| rseA-downF | TCTAGACAACAGGCTCAGTAATC<br>ATTGTG | For <i>rseA</i> knockout. Paired with<br>“rseA-downR”.         |
| rseA-downR | ACCACTAAAGGTTGCTCAACAG            |                                                                |
| rseA-upF   | GTTATACGAAAACGTTGACCCA            | For <i>rseA</i> knockout. Paired with<br>“rseA-upR”.           |
| rseA-upR   | TCTAGAGCCATCCATAAATGCAG<br>AAAG   |                                                                |
| rpoE-downF | ATTCAGTGCTTGAGTGGCTTT             | For <i>rpoE</i> knockout. Paired with<br>“rpoE-downR”.         |
| rpoE-downR | TCTAGAGAGTTATAAGATGGCTG<br>AACCTC |                                                                |
| rpoE-upF   | TCTAGAGGTCACCCAGTTGTACC<br>TTCTCG | For <i>rpoE</i> knockout. Paired with<br>“rpoE-upR”.           |
| rpoE-upR   | GCATGCCGTAACCAAGAGCG              |                                                                |
| rseAcom-F  | TCTAGAGAGTTATAAGATGGCTG<br>AACCTC | For <i>rseA</i> complementation. Paired<br>with “rseAcom-R”    |
| rseAcom-R  | GATTACTGAGCCTGTTGCTGAG            |                                                                |
| rpoEcom-F  | CCAGTTCCAATCTTGGGTCA              | For <i>rpoE</i> complementation. Paired<br>with “rpoEcom-R”    |
| rpoEcom-R  | GGTTCAGCCATCTTATAACTC             |                                                                |
| flhDC RT-F | CGCACATCAGCCTGCAAGT               | For <i>flhDC</i> real-time RT-PCR.<br>Paired with “flhDC RT-R” |
| flhDC RT-R | GCAGGATTGGCGGAAAGTT               |                                                                |
| fliC RT-F  | CGTCTGTCTTCTGGTCTA                | For <i>fliC</i> real-time RT-PCR. Paired<br>with “fliC RT-R”   |
| fliC RT-R  | CCTTCAGTTGTTTGAGCGA               |                                                                |
| mrpI RT-F  | CCCGAAAGAGATTACTGT                | For <i>mrpI</i> real-time RT-PCR.<br>Paired with “mrpI RT-R”   |
| mrpI RT-R  | AGTTGCATAAGGCTTCATA               |                                                                |
| mrpA RT-F  | GGTCTTTAGGCATTGAAGG               | For <i>mrpA</i> real-time RT-PCR.<br>Paired with “mrpA RT-R”   |
| mrpA RT-R  | TCATTGTTACCATCACGCAG              |                                                                |
| mrpJ RT-F  | GAACGAGGTATGAACAAA                | For <i>mrpJ</i> real-time RT-PCR.<br>Paired with “mrpA RT-R”   |
| mrpJ RT-R  | CGTAGCAATCCTCAAAAA                |                                                                |

---

|            |                         |                                                                            |
|------------|-------------------------|----------------------------------------------------------------------------|
| gyrB RT-F  | GACCCGTACGCTAAACAAC     | Internal control for bacteria in real-time RT-PCR. Paired with “gyrB RT-R” |
| gyrB RT-R  | AGAAATAACCGCAATCAGG     |                                                                            |
| mrpA       | GGATCCATGAAATTAATAAATTA | For MrpA-His <sub>6</sub> expression. Paired with “mrpA protein-R”         |
| protein-F  | GCTTTAG                 |                                                                            |
| mrpA       | CTCGAGTTACTGATAAGTCAGTG |                                                                            |
| protein-R  | CGA                     |                                                                            |
| IL-8 RT-F  | CACACTGCGCCAACACA       | For IL-8 real-time RT-PCR. Paired with “IL-8 RT-R”                         |
| IL-8 RT-R  | TCAGCCCTCTTCAAAAACCT    |                                                                            |
| MIF RT-F   | AACCGCTCCTACAGCAAG      | For MIF real-time RT-PCR. Paired with “MIF RT-R”                           |
| MIF RT-R   | GTTGTTCCAGCCCACATT      |                                                                            |
| PAI-1 RT-F | ATGCAGATGTCTCCAGCC      | For PAI-1 real-time RT-PCR. Paired with “PAI-1 RT-R”                       |
| PAI-1 RT-R | GCCACCTGCTGAAACACC      |                                                                            |
| CXCL1      | ACTGCTGCTCCTGCTCCT      | For CXCL1 real-time RT-PCR. Paired with “CXCL1 RT-R”                       |
| RT-F       |                         |                                                                            |
| CXCL1      | CGATGATTTTCTTAACTATGGG  |                                                                            |
| RT-R       |                         |                                                                            |
| GAPDH      | CTTTGGTATCGTGGAAGG      | Internal control for cytokine real-time RT-PCR. Paired with “GAPDH RT-R”   |
| RT-F       |                         |                                                                            |
| GAPDH      | GATGATGTTCTGGAGAGC      |                                                                            |
| RT-R       |                         |                                                                            |
| mrpP1      | GCATCAATAAAGGGTTGTGTTTT | For the IE assay of the MR/P fimbriae. Paired with mrpP2                   |
| mrpP2      | GTAATTGAGCAAGGAGCATCAA  |                                                                            |
|            | T                       |                                                                            |

---

## Supplemental Fig. 1

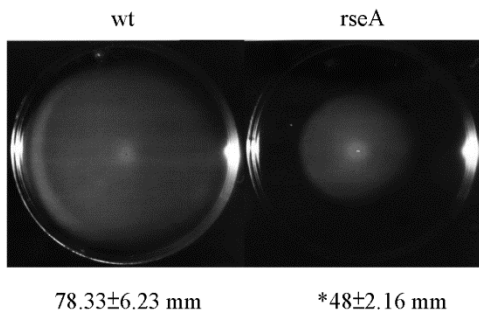

**FIG S1** The effect of *P. mirabilis* RpoE on swimming. The overnight bacterial culture was seeded centrally on 0.3 % LB agar plates. After incubation at 37 °C for 30 h, the migration distance (mm) was determined. All data are the averages and standard deviations of three independent experiments. Significant difference was observed by Student's *t*-test analysis (\*,  $P < 0.05$ ). wt, wild-type; rseA, *rseA* mutant.
